# Supplementary material
Source: PubMed Central journal article supplement (PMC7646215)
Supplement: mmc1.pdf [file mmc1.pdf]

## **Supplemental Information**

### **Circular RNA circSnx5 Controls Immunogenicity of Dendritic Cells through the miR-544/SOCS1 Axis and PU.1 Activity Regulation**

**Qi Chen, Ge Mang, Jian Wu, Ping Sun, Tingting Li, Hanlu Zhang, Naixin Wang, Zhonghua  
Tong, Weiwei Wang, Yang Zheng, Jinwei Tian, Mingyan E, Maomao Zhang, and Bo Yu**

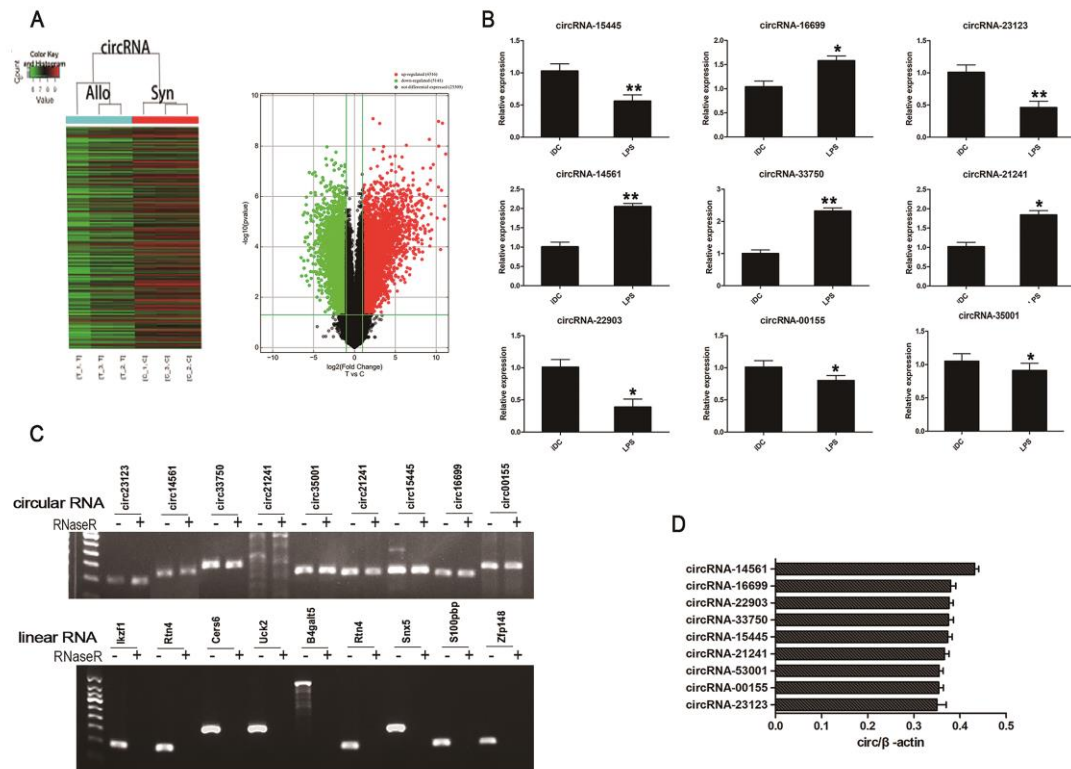

**Figure S1 Identification and validation of DC-enriched circRNAs**

(A) Heat map analyses of microarray data showing that differentially expressed circRNA (left) with fold changes  $>2.0$  and  $P < 0.05$ . The expression levels are presented in different colors indicating expression levels above and below the median expression level across all samples. The volcano plot was constructed using fold-change values and P-values. Red represents increased expression whereas green represents decreased expression. (B) Bone marrow was flushed from the femur and tibia of 8- to 14-week-old and cultured in IL-4 and GM-CSF cultured media for 5 days. DCs were treated with or without 200 ng/ml LPS for 12h at day 5. The expression level of selected 9 strong candidates for circRNAs in the two groups mentioned above by RT-qPCR analysis. (C) agarose gel electrophoresis is validation of circRNAs and their linear isoforms from RNaseR-treated RNA samples isolated from Immature DCs (iDC). (D) The expression level of indicated circRNAs in iDCs was accessed by RT-qPCR analysis. The expression of circRNAs was normalized to  $\beta$ -actin. Data are shown as mean  $\pm$  sd, derived by Student's t-test, \* $p < 0.05$ , \*\* $p < 0.01$ . N=3.

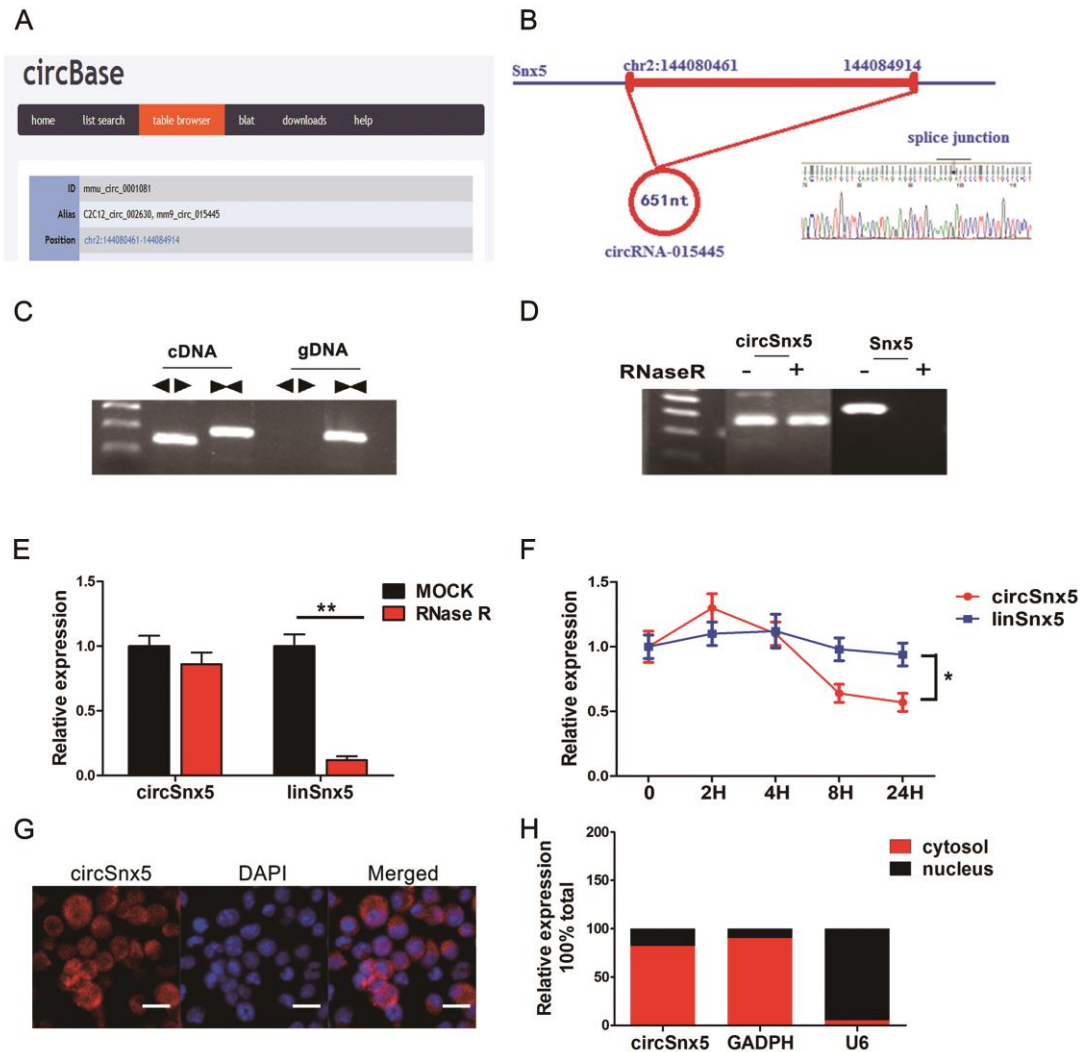

**Figure S2 Characterization of circSnx5 RNA in DCs**

DCs were treated with or without 200 ng/ml LPS for 12h at day 5. (A) ID number and alias of circSnx5 (mmu\_circ\_0001081) from the circBase database. (B) The schematic diagram of genomic location and splicing pattern of circSnx5. The splice junction of specific primers was verified by direct sequencing. (C) circSnx5 was validated by qRT-PCR in DCs using divergent primers (←→) in complementary DNA (cDNA) and genomic DNA (gDNA). (D-E) qRT-PCR analysis for the abundance of circ and their linear isoforms Snx5 mRNA in DCs with or without RNase R treatment. PCR product of circSnx5 was identified by 1.5% agarose gel electrophoresis (D). The expression of circSnx5 and mRNA were normalised to  $\beta$ -action (E). (F) A time course of circSnx5 expression in DCs. qRT-PCRs were conducted to detect circSnx5 expression in the presence of 200ng/ml LPS after 0, 2, 4, 8 and 24 hours. circSnx5 expression was decrease after a slight increase. (G) RNA fluorescence in situ hybridization FISH was performed to detect the expression of circSnx5 in DCs. Nuclei were stained with 4,6-diamidino-2-phenylindole (DAPI). Images were taken by confocal microscopy ( $\times 63$  magnification). Scale bar=50  $\mu$ m. (H) qRT-PCR data indicating the abundance of circSnx5 and Snx5 mRNA in either the cytoplasm or nucleus of iDCs. The amounts of circSnx5 mRNA were normalized to the value measured of nuclear control transcript (U6), cytoplasm control transcript (GAPDH). Data are shown as mean  $\pm$  sd, derived by Student's t-test, \* $p < 0.05$ , \*\* $p < 0.01$ . N=6 independent DC

preparations.

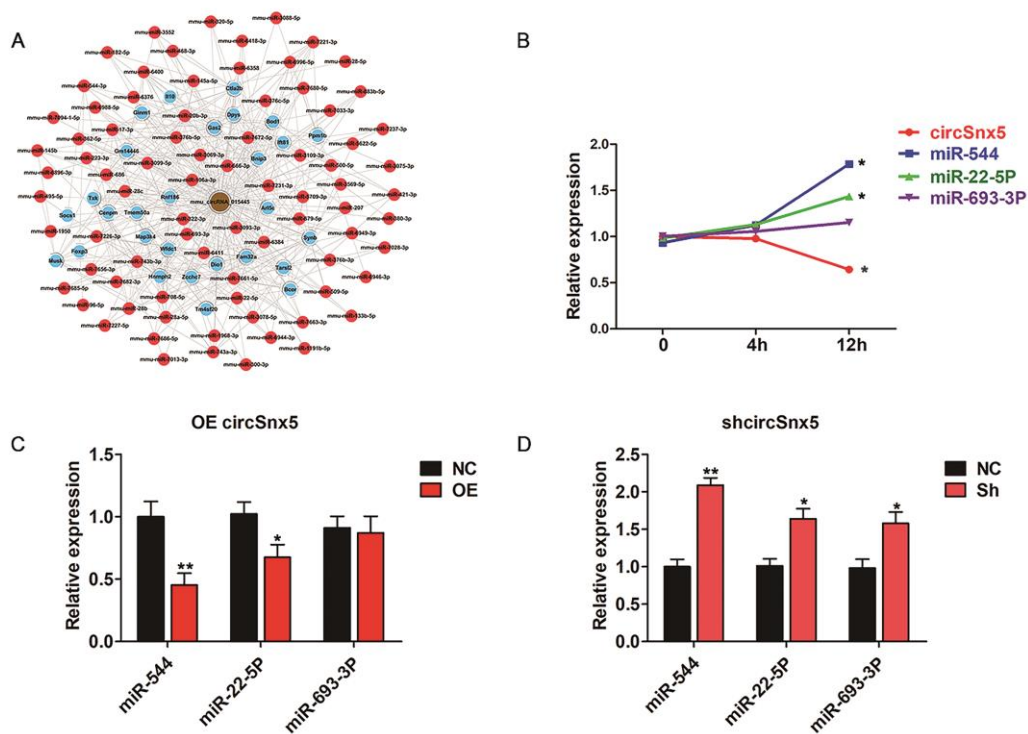

**Figure S3 circSnx5-associated-ceRNA networks in cardiac allograft mice**

(A) The ceRNA network shows 80 circSnx5-associated-miRNAs and 39 immunity related differentially expressed mRNAs were selected under the criteria of P-value<0.01 and Fold Change>3. (B) RT-qPCR analysis of circSnx5, miR-544, miR-22-5p and miR-693-3p expression in LPS-DCs. \*P<0.05 vs. 0h group. (C) RT-qPCR analysis of miR-544, miR-22-5p and miR-693-3p expression in DCs transfected with circSnx5 vector. (D) RT-qPCR analysis of the expression of miR-544, miR-22-5p and miR-693-3p in DCs transfected with a circSnx5 shRNA. Data are shown as mean ± sd, derived by Student's t-test, \*p < 0.05, \*\*p < 0.01. N=6 independent DC preparations.

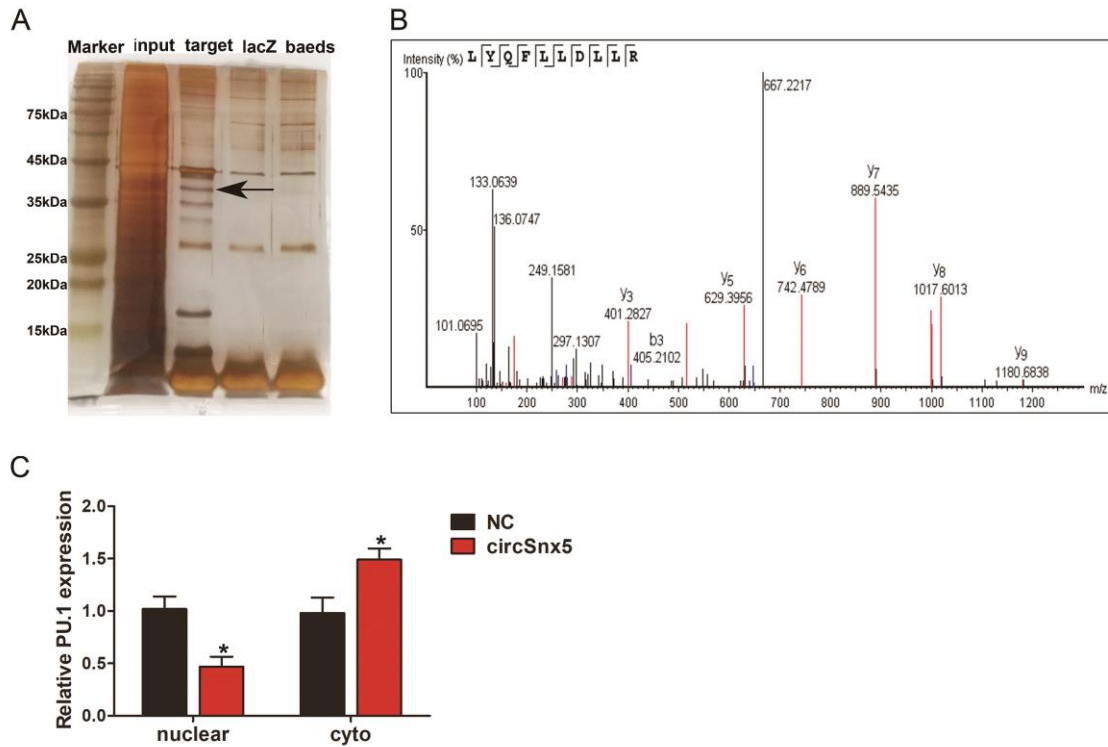

**Figure S4 circSnx5 binds to PU.1**

(A) SDS-PAGE silver staining of circSnx5 pull-down samples in DCs. The target group contained a circSnx5 specific pull-down probe. Input represents the positive control. LacZ and baeds represents negative control. (B) Representative mass spectral maps of PU.1. (C) PU.1 protein were detected in cytoplasm and nucleus by Western blotting after transfection with or without circSnx5 overexpression. Data are shown as mean  $\pm$  sd, derived by Student's t-test, \* $p < 0.05$ , \*\* $p < 0.01$ . N=3 independent DC preparations.

**Table S1. Primers used in study**

| PCR Primers (5' to 3')  |         |                         |
|-------------------------|---------|-------------------------|
| circSnx5<br>(circ15445) | Forward | CATAGAGGCTGCAAAGATCC    |
|                         | Reverse | CAGTTCTTGCTTCATCTTGGC   |
| circ22903               | Forward | ATGAGGGTCAAGACATGTC     |
|                         | Reverse | CATTGTCTTCAGGTTATCCATG  |
| circ14561               | Forward | GAGCTGAATAAACTTCAGATGAG |
|                         | Reverse | TCTTGACCAGACGAAACAGT    |
| circ33750               | Forward | GGCATATTCCTCTCTGATTC    |
|                         | Reverse | TTGGAGAGCCCTTCTAATCT    |
| circ21241               | Forward | GTGCCGACAATCTCGTCTTC    |
|                         | Reverse | GACTCGGTAGAAGCTATCCTG   |
| circ35001               | Forward | GTCCAGTTTCTTGGCAGTGAAC  |
|                         | Reverse | CTGCTGTTCTTGGCATAG      |
| circ23123               | Forward | GTTGCCATATCAGAGGAATTGG  |
|                         | Reverse | GAGCAAAAAGGGTCTCATCTTC  |

|                         |                    |                                                                                          |
|-------------------------|--------------------|------------------------------------------------------------------------------------------|
| circ16699               | Forward<br>Reverse | AGGGGACTCTAACCAAGATATG<br>CAAGGAGTCATCCAACATCATC                                         |
| circ00155               | Forward<br>Reverse | GCACTCAATGTCCCTGATAG<br>GAGTTTCTACCTTTACAGGC                                             |
| Ikzf1                   | Forward<br>Reverse | TCCGAGGTGGTGCCAGTCATC<br>CGGCGTCCTGTGCTGAATGG                                            |
| Rtn4                    | Forward<br>Reverse | ACTGGAAGGACTCGGTGGTGTG<br>AGTTGTTCGGACAGAATGTGACTTGAC                                    |
| Cers6                   | Forward<br>Reverse | TGAACTGCTTCTGGTCTTACCTGATTG<br>TCCGTTGGTGGTTGTTGAAGAGTG                                  |
| Uck2                    | Forward<br>Reverse | GTGTAGCCGTTGAGATAGCCGTTT<br>GTGTAGCCGTTGAGATAGCCGTTT                                     |
| B4galt5                 | Forward<br>Reverse | GGCGGAGAAGATGACGACTTGTG<br>CGATGGTGGTGAGGAATGGACTTG                                      |
| Snx5                    | Forward<br>Reverse | GCTCCTCCGATACTACATGCTCAAC<br>CCTGCTGATGAGTCTCTGCCAAC                                     |
| Zfp148                  | Forward<br>Reverse | GCAGCAGGCTTTGGACAGAA<br>GCGGATTTGGAAGGGTCTGG                                             |
| miR-544                 | Forward<br>Reverse | GGAAGGATCCACAAGTCACTCTCTAT<br>GGAAGGATCCACAAGTCACTCTCTAT                                 |
| hnRNP C                 | Forward<br>Reverse | CGTGTACCTCCTCCTCCTCTATTG<br>TCTCTACTGCTTGTGCTCTGTTC                                      |
| PU.1                    | Forward<br>Reverse | TCTGGTGGGTGGACAAGGAC<br>TCTTCTTGCGGTTGCCCTTC                                             |
| $\beta$ -catin          | Forward<br>Reverse | GCTTCTAGGCGGACTGTTAC<br>CCATGCCAATGTTGTCTCTT                                             |
| RIP Primers (5' to 3')  |                    |                                                                                          |
| site a                  | Forward<br>Reverse | AGGCATGCACCACCAC<br>GCGGATTTCTGAGTTTCGAG                                                 |
| site b                  | Forward<br>Reverse | GAAGAGATAGCAATCAGTGCTCTG<br>CAAGGTCTACAAAGTGAGTTCCAG                                     |
| site c                  | Forward<br>Reverse | GAGCTCCTCCGATACTACATG<br>CAACATTCTCTCTAACCAG                                             |
| site d                  | Forward<br>Reverse | GCAATAGAGACACATGCATATGC<br>CTGGAAAGATTAACAATCATGATG                                      |
| others                  |                    |                                                                                          |
| miR-544-3P<br>inhibiter | primer             | mmu_circRNA_015445-1 GAGGCTGCAAAGATCCCTCCT<br>mmu_circRNA_015445-2 GCTGCAAAGATCCCTCCTGCT |
| shSOCS1                 | primer             | GACAATGCAGTCTCCACAGCA                                                                    |
| shhnRNP C               | primer             | GCAACAAATTGATGAGCAATG                                                                    |
| si PU.I                 | primer             | GGATTTCTCCGCACACCATGT                                                                    |

|                |        |                       |
|----------------|--------|-----------------------|
| circSnx5 shRNA | primer | GAGGCTGCAAAGATCCCTCCT |
|----------------|--------|-----------------------|

**Table S2. The miRNAs data obtained from circSnx5-associated ceRNA networks**

| miRNA           | Sites total | Context+ |
|-----------------|-------------|----------|
| mmu-miR-22-5p   | 2           | -0.072   |
| mmu-miR-544-3p  | 2           | -0.284   |
| mmu-miR-693-3p  | 2           | -0.088   |
| mmu-miR-6400    | 2           | -0.454   |
| mmu-miR-7028-3p | 2           | -0.41    |
| mmu-miR-7685-5p | 2           | -0.166   |
| mmu-miR-17-3p   | 1           | -0.086   |
| mmu-miR-20b-3p  | 1           | -0.104   |
| mmu-miR-28b     | 1           | -0.238   |
| mmu-miR-28c     | 1           | -0.275   |
| mmu-miR-28a-5p  | 1           | -0.203   |
| mmu-miR-28-5p   | 1           | -0.275   |
| mmu-miR-106a-3p | 1           | -0.086   |
| mmu-miR-133b-5p | 1           | -0.388   |
| mmu-miR-145b    | 1           | -0.245   |
| mmu-miR-145b    | 1           | -0.245   |
| mmu-miR-145a-5p | 1           | -0.245   |
| mmu-miR-182-5p  | 1           | -0.15    |
| mmu-miR-207     | 1           | -0.123   |
| mmu-miR-223-3p  | 1           | -0.33    |
| mmu-miR-300-3p  | 1           | -0.197   |
| mmu-miR-320-5p  | 1           | -0.126   |
| mmu-miR-322-3p  | 1           | -0.163   |
| mmu-miR-362-5p  | 1           | -0.178   |
| mmu-miR-376b-3p | 1           | -0.126   |
| mmu-miR-376b-5p | 1           | -0.08    |
| mmu-miR-376c-5p | 1           | -0.09    |
| mmu-miR-380-3p  | 1           | -0.129   |
| mmu-miR-421-3p  | 1           | -0.272   |
| mmu-miR-468-3p  | 1           | -0.152   |
| mmu-miR-495-5p  | 1           | -0.165   |
| mmu-miR-500-5p  | 1           | -0.168   |
| mmu-miR-509-5p  | 1           | -0.204   |
| mmu-miR-666-3p  | 1           | -0.197   |
| mmu-miR-679-5p  | 1           | -0.323   |
| mmu-miR-686     | 1           | -0.132   |
| mmu-miR-708-5p  | 1           | -0.157   |
| mmu-miR-743b-3p | 1           | -0.144   |

|                   |   |        |
|-------------------|---|--------|
| mmu-miR-743a-3p   | 1 | -0.123 |
| mmu-miR-883b-5p   | 1 | -0.331 |
| mmu-miR-1191b-5p  | 1 | -0.158 |
| mmu-miR-1950      | 1 | -0.366 |
| mmu-miR-1968-3p   | 1 | -0.365 |
| mmu-miR-3069-3p   | 1 | -0.187 |
| mmu-miR-3075-3p   | 1 | -0.22  |
| mmu-miR-3078-5p   | 1 | -0.14  |
| mmu-miR-3088-5p   | 1 | -0.09  |
| mmu-miR-3093-3p   | 1 | -0.16  |
| mmu-miR-3099-5p   | 1 | -0.304 |
| mmu-miR-3109-3p   | 1 | -0.251 |
| mmu-miR-3552      | 1 | -0.164 |
| mmu-miR-3569-5p   | 1 | -0.503 |
| mmu-miR-5622-5p   | 1 | -0.336 |
| mmu-miR-5709-3p   | 1 | -0.242 |
| mmu-miR-6358      | 1 | -0.197 |
| mmu-miR-6376      | 1 | -0.169 |
| mmu-miR-6384      | 1 | -0.196 |
| mmu-miR-6411      | 1 | -0.218 |
| mmu-miR-6418-3p   | 1 | -0.339 |
| mmu-miR-6896-3p   | 1 | -0.071 |
| mmu-miR-6944-3p   | 1 | -0.126 |
| mmu-miR-6946-3p   | 1 | -0.079 |
| mmu-miR-6949-3p   | 1 | -0.343 |
| mmu-miR-6988-5p   | 1 | -0.378 |
| mmu-miR-6996-5p   | 1 | -0.258 |
| mmu-miR-6996-5p   | 1 | -0.258 |
| mmu-miR-7013-3p   | 1 | -0.182 |
| mmu-miR-7033-3p   | 1 | -0.312 |
| mmu-miR-7094-1-5p | 1 | -0.112 |
| mmu-miR-7221-3p   | 1 | -0.323 |
| mmu-miR-7226-3p   | 1 | -0.202 |
| mmu-miR-7227-5p   | 1 | -0.288 |
| mmu-miR-7231-3p   | 1 | -0.142 |
| mmu-miR-7237-3p   | 1 | -0.199 |
| mmu-miR-7656-3p   | 1 | -0.113 |
| mmu-miR-7661-5p   | 1 | -0.051 |
| mmu-miR-7663-3p   | 1 | -0.205 |
| mmu-miR-7672-5p   | 1 | -0.286 |
| mmu-miR-7682-3p   | 1 | -0.235 |
| mmu-miR-7680-5p   | 1 | -0.112 |
| mmu-miR-7686-5p   | 1 | -0.233 |



**Supplemental Table 3. Sequences of probes used in the RNA pull down experiment**

| Gene name | Label           | Probe sequence       |
|-----------|-----------------|----------------------|
| circSnx5  | Biotin labeling | CAGGAGGGATCTTTGCAGCC |
